# Supplementary material for: High-level information encryption based on optical nanomaterials with multi-mode luminescence and dual-mode reading
Source: Royal Society of Chemistry journal article supplement (doi:10.1039/d2qi00889k), 2022-01-01
Supplement: d2qi00889k1.pdf [file d2qi00889k1.pdf]

1 **Supporting information**

2 **High-level information encryption based on optical nanomaterials with multi-mode luminescence**  
3 **and dual-mode reading**

4 *Lin Liu<sup>abc</sup>, Shanshan Peng<sup>ab</sup>, Peng Lin<sup>ab</sup>, Ruoping Wang<sup>abc</sup>, Hongyun Zhong<sup>ab</sup>, Xia Sun<sup>d</sup>, Song Liang<sup>ab</sup>,*  
5 *Junpeng Shi<sup>abce,\*</sup> and Yun Zhang<sup>abcde,\*</sup>*

6 <sup>a</sup>State Key Laboratory of Structural Chemistry, Fujian Institute of Research on the Structure of Matter,  
7 Chinese Academy of Sciences, Fuzhou 350002, China

8 <sup>b</sup>Xiamen Key Laboratory of Rare Earth Photoelectric Functional Materials, Xiamen Institute of Rare  
9 Earth Materials, Haixi Institute, Chinese Academy of Sciences, Xiamen 361021, China

10 <sup>c</sup>University of Chinese Academy of Sciences, Beijing 100049, China

11 <sup>d</sup>Fujian Science and Technology Innovation Laboratory for Optoelectronic Information of China,  
12 Fuzhou 350108, China

13 <sup>e</sup>Ganjiang Innovation Academy, Chinese Academy of Sciences, Ganzhou 341000, China

14

15 E-mail: shijunpeng10@mails.ucas.edu.cn;

16 E-mail: zhangy@fjirsm.ac.cn

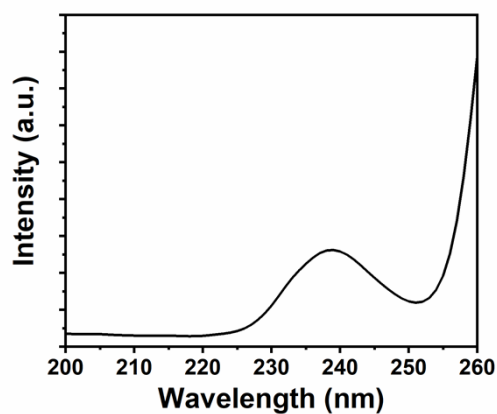

1  
2

**Figure S1.** PL excitation spectrum of MLGB monitoring 311 nm emission.

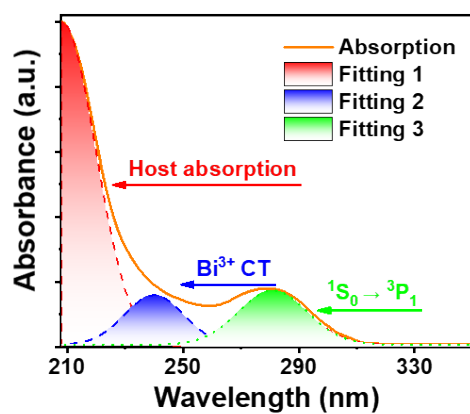

3  
4

**Figure S2.** UV-visible absorption spectrum of MLGB with deconvoluted peaks.

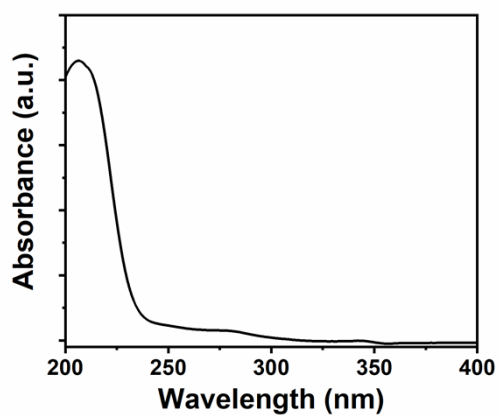

5  
6

**Figure S3.** UV-visible absorption spectrum of the host MLG.

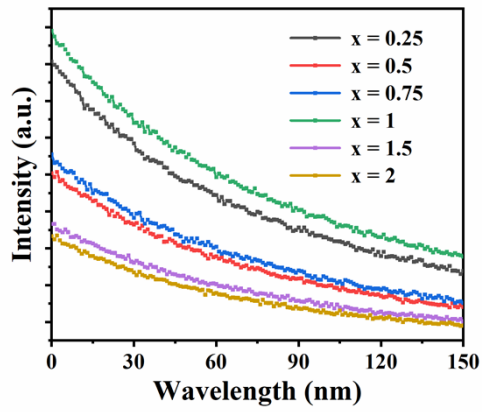

1  
 2 **Figure S4.** Relationship between the concentration of the dopant  $\text{Bi}^{3+}$  and the decay of the PersL at 306  
 3 nm.

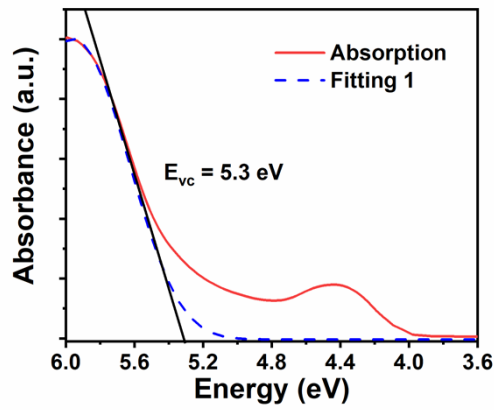

4  
 5 **Figure S5.** UV-visible absorption spectrum of MLGB and its energy gap.

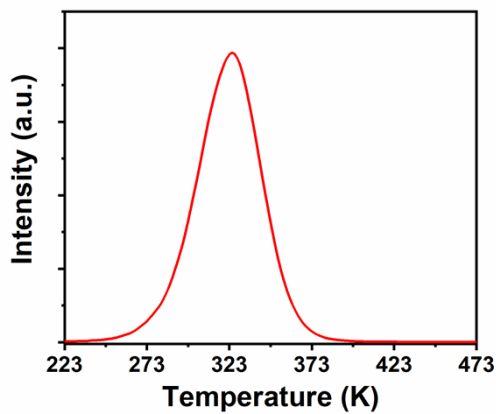

6  
 7 **Figure S6.** TL spectrum of MLGB.

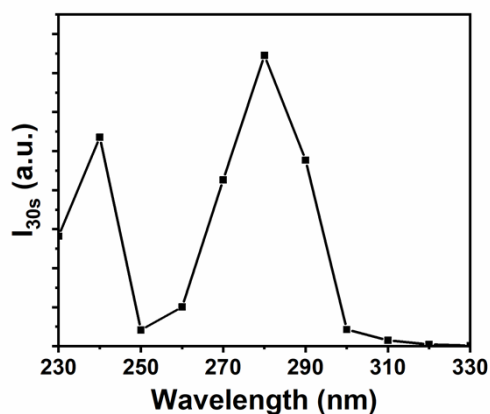

1  
2

Figure S7. PersL excitation spectrum of MLGB.

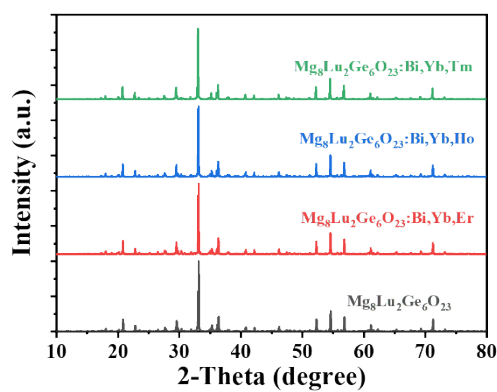

3  
4

Figure S8. XRD patterns of MLG host and MLGB-Yb/Ln (Ln = Tm, Ho, Er).

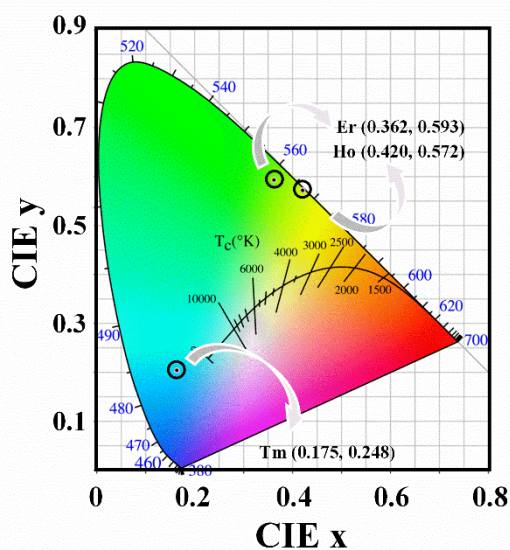

5  
6

Figure S9. Chromaticity coordinates of MLGB-YB/Ln.

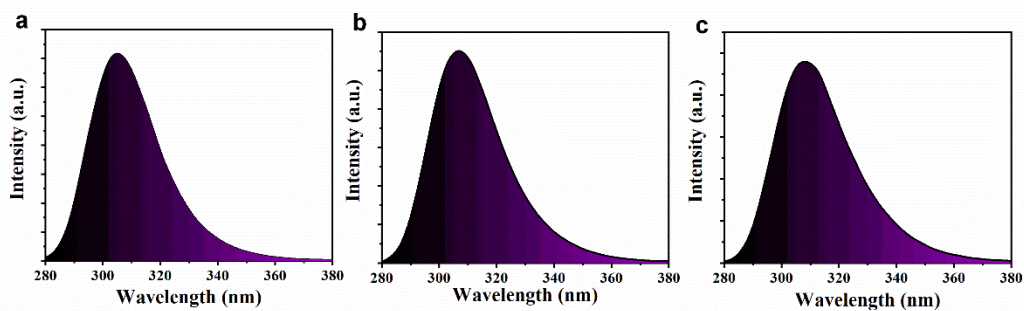

1

2

**Figure S10.** PersL spectra of (a). MLGB-Yb/Tm, (b). MLGB-Yb/Ho and (c) MLGB-Yb/Er.

3

4 **Table S1.** The content of the ions that are really doped into MLG.

| Materials/dopants | Bi     | Yb     | Ln     |
|-------------------|--------|--------|--------|
| MLGB              | 0.590% | -      | -      |
| MLGB-Yb/Tm        | 0.641% | 1.362% | 0.664% |
| MLGB-Yb/Ho        | 0.546% | 1.134% | 0.640% |
| MLGB-Yb/Er        | 0.571% | 1.242% | 0.574% |

5

6
